# Supplementary material for: Short-Term Post-Harvest Stress that Affects Profiles of Volatile Organic Compounds and Gene Expression in Rocket Salad during Early Post-Harvest Senescence
Source: Plants (Basel). 2019 Dec 18;9(1):4. doi: 10.3390/plants9010004 (PMC7020156; doi:10.3390/plants9010004)
Supplement: Supplementary file 1 [file plants-09-00004-s001.xlsx]

## Sheet:  Table S1 -24 h stress
Table S1 list of VOCs detected following 24 h stress treatments
code	name (NIST)	control	cold	wounded	dark ambient	mean RI	chemical family	IUPAC name
C1	(E)-4-oxohex-2-enal	1	1	1	1	1077	aldehyde	(2E)-4-oxo-2-hexenal
C2	1-butene, 4-isothiocyanato-	1	1	1	1	1021	isothiocyanate	4-isothiocyanato-1-butene
C3	1-butene, 4-isothiocyanato-1-(methylthio)-	1	1	1	1	1481	isothiocyanate	(1E)-4-isothiocyanato-1-(methylsulfanyl)-1-butene
C4	1-penten-3-ol	1	1	1	1	678	alcohol	1-penten-3-ol
C5	1-penten-3-one	1	1	1	1	682	ketone	1-penten-3-one
C6	1H-2-indenone,2,4,5,6,7,7a-hexahydro-3-(1-methylethyl)-7a-methyl	1		1	1	1538	ketone	3-isopropyl-7a-methyl-1,4,5,6,7,7a-hexahydro-2H-inden-2-one
C7	1H-indole, 2-(1,1-dimethylethyl)-	1		1		1581	nitrogen compound	2-(2-methyl-2-propanyl)-1H-indole
C8	2-hexen-1-ol, (E)-	1	1			882	alcohol	(2E)-2-hexen-1-ol
C9	2-hexenal, (E)-	1	1	1	1	865	aldehyde	(2E)-2-hexenal
C10	2-pentenal, (E)-	1	1	1	1	760	aldehyde	(2E)-2-pentenal
C11	2,4-hexadienal, (E,E)-	1	1	1	1	933	aldehyde	(2E,4E)-2,4-hexadienal
C12	3-hexen-1-ol	1	1	1	1	872	alcohol	3-hexen-1-ol
C13	3-hexen-1-ol, acetate, (Z)-	1	1	1	1	1033	ester	(3Z)-3-hexen-1-yl acetate
C14	3-hexenal, (Z)-	1	1	1	1	901	aldehyde	(3Z)-3-hexenal
C15	3-octyne	1	1	1	1	920	alkyne	3-octyne
C16	4-methylpentyl isothiocyanate	1	1	1	1	1184	isothiocyanate	1-isothiocyanato-4-methylpentane
C17	5-nonanone, oxime	1	1	1	1	791	nitrogen compound	n-hydroxy-5-nonanimine
C18	benzaldehyde, 4-ethyl-	1	1	1	1	1196	aldehyde	4-ethylbenzaldehyde
C19	butanal, O-methyloxime	1	1	1	1	676	nitrogen compound	(1Z)-n-methoxy-1-butanimine
C20	butane, 1-isothiocyanato-3-methyl-	1	1	1	1	1082	isothiocyanate	1-isothiocyanato-3-methylbutane
C21	cyclopentanol, 1-ethyl-	1	1		1	1091	alcohol	1-ethylcyclopentanol
C22	hexane, 1-isothiocyanato-	1	1	1	1	1223	isothiocyanate	1-isothiocyanatohexane
C23	megastigma-4,6(E),8(Z)-triene		1	1	1	1479	alkene	(6Z)-6-[(2E)-2-buten-1-ylidene]-1,5,5-trimethylcyclohexene
C24	n-pentyl isothiocyanate	1	1	1	1	1119	isothiocyanate	1-isothiocyanatopentane
C25	oxalic acid, diallyl ester	1	1	1	1	809	ester	diallyl oxalate
C26	propane, 1-isothiocyanato-3-(methylthio)-	1	1	1	1	1354	isothiocyanate	1-isothiocyanato-3-(methylsulfanyl)propane
C27	pyrrolidine-1-dithiocarboxylic acid, 2-oxocyclopentyl ester	1	1	1	1	1392	sulphur compound	2-oxocyclopentyl 1-pyrrolidinecarbodithioate
C28	thiocyanic acid, methyl ester	1	1	1	1	722	sulphur compound	methyl thiocyanate
	total count	27	26	26	26

## Sheet: Table S2 - 24h stress+7d
Table S2 list of VOCs detected following 24 h stress treatments followed by 7 d of chilled storage
code	name (NIST)	control	cold	wounded	dark ambient	mean RI	chemical family	IUPAC name
C1	1-decanol, 2-hexyl-	1	1		1	1597.03	alcohol	2-hexyl-1-decanol
C2	1-decanol, 2-methyl-	1	1	1	1	1259.23	alcohol	2-methyl-1-decanol
C3	1-hexanol, 5-methyl-2-(1-methylethyl)-	1	1	1	1	1076.7	alcohol	2-isopropyl-5-methyl-1-hexanol
C4	1-octanol, 2,2-dimethyl-	1	1	1	1	1214.36	alcohol	2,2-dimethyl-1-octanol
C5	branched alkanol1	1	1	1	1	1061.32	alcohol	alcohol
C6	branched alkanol2	1	1	1	1	1273.34	alcohol	alcohol
C7	branched alkanol3	1	1	1	1	1311.37	alcohol	alcohol
C8	2-undecene, 5-methyl-	1	1	1	1	1206.75	alkene	5-methyl-2-undecene
C9	7-tetradecene	1	1	1	1	1322.69	alkene	7-tetradecene
C10	alkene1	1	1	1	1	1283.08	alkene	alkene
C11	branched alkene1	1	1	1	1	1178.15	alkene	alkene
C12	2,2'-dimethylbiphenyl	1	1	1	1	1759.99	aromatic	2,2'-dimethylbiphenyl
C13	benzene, 1,1'-(1,1,2,2-tetramethyl-1,2-ethanediyl)bis-	1	1	1	1	1846.07	aromatic	1,1'-(2,3-Dimethyl-2,3-butanediyl)dibenzene
C14	benzene, 1,2,3-trimethyl-	1	1	1	1	1022.68	aromatic	1,2,3-Trimethylbenzene
C15	benzene, 1,2,4-trimethyl-	1		1	1	1022.54	aromatic	1,2,4-trimethylbenzene
C16	Benzene, 1,3-diethyl-	1	1	1	1	1042.32	aromatic	1,3-Diethylbenzene
C17	benzene, 1-ethyl-4-methyl-	1	1	1	1	992.23	aromatic	1-Ethyl-4-methylbenzene
C18	p-xylene	1	1	1	1	888.773	aromatic	p-xylene
C19	3-hexen-1-ol, acetate, (E)-	1	1	1	1	1029.05	ester	(3E)-3-hexen-1-yl acetate
C20	3-hexen-1-ol, acetate, (Z)-	1	1	1	1	1029.17	ester	(3Z)-3-hexen-1-yl acetate
C21	butanoic acid, 3-hexenyl ester, (E)-	1	1	1	1	1133.5	ester	(3E)-3-hexen-1-yl butyrate
C22	n-valeric acid cis-3-hexenyl ester	1	1	1	1	1232.14	ester	(3Z)-3-hexen-1-yl valerate
C23	n-valeric acid ester			1	1	1235.92	ester	n-valeric acid ester
C24	n-heptyl isocyanate	1	1	1	1	1039.33	isocyanate	1-isocyanatoheptane
C25	1H-Benzocycloheptene, 2,4a,5,6,7,8,9,9a-octahydro-3,5,5-trimethyl-9-methylene-,	1	1	1	1	1437.83	terpene	alpha-Himachalene
C26	3-carene	1	1	1	1	1032.88	terpene	3-carene
C27	D-limonene	1	1	1	1	1044.65	terpene	D-limonene
C28	unknown	1	1	1	1	1010.66	Unknown	unknown
C29	unknown1	1	1	1	1	1029.49	Unknown	unknown
C30	unknown3			1	1	1314.65	unknown	unknown
	total count	26	25	28	28

## Sheet:  Table S3 -24h  data
Table S3: relative abundance of VOCs detected following 24 h stress treatments,
	C1	C2	C3	C4	C5	C6	C7	C8	C9	C10	C11	C12	C13	C14	C15	C16	C17	C18	C19	C20	C21	C22	C23	C24	C25	C26	C27	C28
ColdR1	1.20484	0.441675	5.69035	0.581274	1.08198	0.0242962	0.0242962	0.0242962	2.9185	1.00741	1.17726	3.06048	0.960142	0.697085	0.578567	3.34167	0.299904	0.657245	0.0242962	0.250246	0.162592	2.71701	0.511492	2.27979	3.85265	1.14101	1.2632	0.278614
ColdR2	0.996252	0.420044	4.8943	0.422653	0.379397	0.0242962	0.0242962	0.0856102	3.65039	0.78995	1.17344	2.72457	1.17557	0.531554	0.571495	4.25892	0.450201	0.657666	0.144654	0.281729	0.590843	3.52844	0.460802	2.41366	2.78299	0.97451	1.81757	0.311416
ColdR3	0.42341	0.0242962	8.31498	0.543925	0.675899	0.0242962	0.0242962	0.0242962	1.26045	1.11621	0.665408	1.46683	0.597291	0.289228	0.301586	2.92159	0.96738	0.376662	0.358002	0.228113	0.0242962	2.33855	0.0242962	1.72756	0.0242962	1.77554	1.59131	0.192632
DarkR1	1.08005	0.468699	4.66162	0.99636	1.12959	0.0242962	0.0242962	0.0242962	2.88311	0.725299	1.42791	1.19165	0.519757	0.43371	0.443689	3.08689	0.633038	0.731531	0.0242962	0.31936	0.907181	2.64064	0.0242962	2.40084	2.55885	1.26415	5.41986	0.12059
DarkR2	0.359165	0.209277	6.25756	0.404316	0.431745	0.65644	0.0242962	0.0242962	3.69711	0.545502	0.484181	0.414311	0.195953	0.189046	0.193388	3.64866	0.645882	0.787291	0.284213	0.109216	0.357491	3.30782	0.514555	1.05414	2.08965	1.38633	3.48852	0.243902
DarkR3	0.465928	0.0242962	8.19561	0.635596	0.743023	0.925983	0.0242962	0.0242962	1.89726	0.69398	0.636368	0.920761	0.281647	0.398364	0.183957	2.16026	0.679492	0.361488	0.374646	0.173803	0.699298	1.73889	0.444958	1.61056	2.6902	0.812721	2.35487	0.134708
ControlR1	1.11599	0.401091	4.61241	1.17018	1.02188	0.402073	0.0242962	0.137485	2.76974	0.868768	2.0882	2.41614	1.52753	0.277334	0.54968	3.33359	0.15874	0.764965	0.0242962	0.404132	3.21697	3.09239	0.0242962	2.73567	2.15364	0.987295	2.89155	0.363573
ControlR2	0.777701	0.437387	5.66266	0.221832	0.43051	0.0242962	0.0242962	0.124426	2.2749	0.357791	1.15738	2.92974	1.51849	0.387532	0.190806	4.25637	0.0543279	0.465476	0.0242962	0.417482	0.391319	3.60306	0.0242962	3.07637	2.70155	0.811703	0.0242962	0.320391
ControlR3	1.03474	0.0242962	5.67783	0.323739	0.385051	0.459353	0.21821	0.0242962	3.58727	0.63087	0.57436	0.964472	0.585531	0.210429	0.236343	4.52659	0.128827	0.742631	0.764167	0.384593	0.800683	3.59781	0.0242962	3.05237	2.40628	0.785867	0.0242962	0.332099
WoundR1	0.0242962	0.165336	6.29797	0.791404	1.09315	0.993011	0.0242962	0.0242962	4.84013	0.529757	0.779588	3.85685	0.675771	0.411442	0.294172	1.8816	1.79663	0.547648	0.420183	0.0948225	0.0242962	1.35599	0.814166	1.26379	0.0242962	1.50799	1.99283	0.0242962
WoundR2	1.1552	0.414682	3.80062	0.0242962	1.41992	0.390424	0.423801	0.0242962	3.84166	1.03481	1.65194	2.06651	1.08953	0.622172	0.671463	2.4126	4.08618	0.901898	4.13435	0.234177	0.0242962	2.00956	0.495548	1.89914	2.27156	0.738665	1.63512	0.313795
WoundR3	0.819547	0.0242962	4.72591	0.919546	1.2799	1.31264	0.215426	0.0242962	6.19932	0.613695	0.756048	0.764705	0.329431	0.608161	0.263498	2.02926	2.69674	0.509357	3.37547	0.177493	0.0242962	1.41916	0.337513	1.30826	2.25295	0.419218	0.204304	0.144341

## Sheet: Table S4- 24h +7d data  
Table S4: relative abundance of VOCs detected following 24 h stress treatments followed by 7 d of chilled storage,
	C1	C2	C3	C4	C5	C6	C7	C8	C9	C10	C11	C12	C13	C14	C15	C16	C17	C18	C19	C20	C21	C22	C23	C24	C25	C26	C27	C28	C29	C30
CONTROLR1	0.00683553	2.33718	0.00683553	0.92092	0.00683553	1.34582	2.93319	3.39096	1.42423	1.19199	1.27246	0.246134	0.113017	0.445877	0.279549	0.440208	0.163186	0.00683553	0.00683553	3.95301	0.00683553	4.00807	0.00683553	3.30252	0.616428	0.476426	0.781812	4.72454	0.00683553	0.00683553
CONTROLR2	0.21194	1.38867	1.77155	0.789934	0.678119	0.869479	1.47283	2.3832	0.881512	1.42037	0.928429	0.14883	0.116348	0.288641	0.138643	0.00683553	0.00683553	0.0152847	4.35074	3.01288	1.64644	3.42414	0.00683553	2.61528	0.390616	0.428277	0.626611	4.02187	3.90116	0.00683553
CONTROLR3	0.248847	1.25442	0.821218	0.882053	0.605383	0.792249	1.35585	2.206	0.818798	1.24773	0.715968	0.00683553	0.105333	0.317307	0.350623	0.00683553	0.207454	0.0221233	4.65369	3.71962	1.12099	2.89706	0.00683553	2.58621	0.533924	0.473797	0.615298	4.44227	3.70712	0.00683553
COLDR1	0.134431	1.46074	2.13175	1.09677	1.20506	0.984125	1.53578	2.47344	1.02371	1.43115	1.06225	0.00683553	0.121956	0.356473	0.00683553	0.00683553	0.00683553	0.00683553	4.37338	2.60739	1.44483	3.41526	1.69968	2.97149	0.607864	0.524219	0.702485	3.51955	3.45211	0.00683553
COLDR2	0.00683553	1.70381	2.19693	0.730955	1.23254	0.985384	1.59217	2.53853	1.02871	0.939428	1.42931	0.251156	0.104606	0.528112	0.00683553	0.432947	0.461264	0.042843	4.33178	3.20379	0.00683553	3.06759	0.00683553	3.04178	0.49582	0.632095	0.859598	3.88567	3.36963	0.00683553
COLDR3	0.00683553	1.46717	0.00683553	0.594332	0.971095	0.991404	1.56239	2.60353	1.0832	1.66855	1.04003	0.00683553	0.105827	0.490278	0.00683553	0.00683553	0.00683553	0.068869	3.52895	0.00683553	1.99383	4.73437	0.00683553	3.23705	0.60022	0.637564	0.911224	3.88613	3.87722	0.00683553
DARKR1	0.223312	1.21952	1.65748	0.969168	1.24403	0.903761	1.63595	2.4262	0.870624	1.47273	0.741383	0.279447	0.133668	0.425004	0.343367	0.00683553	0.317769	0.0371001	4.39212	2.67746	0.836002	3.32571	0.00683553	2.84859	0.471854	0.563015	0.923212	4.18218	3.75133	0.766469
DARKR2	0.176573	1.3416	1.60781	0.55391	1.10427	0.971377	1.63434	2.33218	0.857437	1.39247	0.845966	0.120032	0.105681	0.540067	0.353406	0.00683553	0.257722	0.0244146	4.57755	2.90745	1.35559	3.10778	0.00683553	2.87816	0.603125	0.602414	0.973311	3.61034	4.14842	0.00683553
DARKR3	0.181381	1.50296	1.78474	0.863938	1.07533	0.782572	1.37721	1.94734	0.746994	1.16612	0.785366	0.145833	0.106371	0.479724	0.305093	0.370709	0.28851	0.0195742	3.82303	3.05319	2.43844	3.4767	0.00683553	2.56406	0.491864	0.469431	0.715116	3.64576	4.41472	0.952424
WOUNDR1	0.00683553	1.81322	0.00683553	1.13391	1.47862	1.037	1.51314	2.57593	0.889809	1.3685	0.804751	0.00683553	0.105089	0.504134	0.35973	0.433194	0.140282	0.0341819	0.00683553	2.93175	1.67775	3.34659	2.01095	3.09487	0.585495	0.64037	0.876416	4.15662	4.68183	1.54099
WOUNDR2	0.00683553	1.56356	0.00683553	0.669573	1.51979	1.116	1.81066	2.76465	0.927367	1.56506	0.83819	0.00683553	0.137858	0.531395	0.351848	0.00683553	0.294408	0.0333341	3.46545	0.00683553	1.33175	3.24637	1.83598	3.13837	0.697711	0.671152	0.876641	3.65347	4.85553	1.39039
WOUNDR3	0.00683553	1.07296	0.628115	0.776241	1.01671	0.898801	1.0886	2.00638	0.815124	1.09404	0.652538	0.53107	0.142111	0.509587	0.00683553	0.443169	0.451229	0.0348071	4.35927	3.23614	1.59124	2.91054	1.80016	2.29241	0.00683553	0.487583	0.832028	3.17593	5.06451	1.3815

## Sheet: Table S5
Table S5 - all primers used in this work for PCR
	gene target/primer name	primer sequence
	DtTMT F	AACCTGACGGCGAACTCATT
	DtTMT R	ACTGCCTTGAATCCTACCGG
	DtNAC19A F	CGGGTTCAATGGTTTAGCGG
	DtNAC19A R	GAGCAAAGCCAAAGTCGTCC
	DtNAC59 F	GCTCGGTTCATCATCGACT
	DtNAC59 R	CGAACCATCAAAACCGTGACC
	EF1aF	TCTTGGTAGACGCCTTCACG
	EF1aR	AGGAAGCGGTGTCATTGTTG
